# Supplementary material for: Metabolite analysis reveals flavonoids accumulation during flower development in Rhododendron pulchrum sweet (Ericaceae)
Source: PeerJ journal article supplement (doi:10.7717/peerj.17325), 2024-05-31
Supplement: Raw_data.xlsx [file Raw_data.xlsx]

## Sheet: all metabolites
Metabolites reporting cheklist
Index	Ion mode	m/z		Rt (min)	Molecular Weight (Da)	Ionization model	KEGG ID	Compounds	Class	mix01	mix02	mix03	bud stage-replicate 1	bud stage-replicate 2	pre-flowering stage- replicate 1	pre-flowering stage-replicate 2	full bloom stage-replicate 1	fulll bloom stage-replicate 2	mix	bud stage-average	pre-flowering stage-average	full bloom stage-average
		precursor ions (Q1)	main fragments ions (Q3)
Rhs109	Positive	479	317.3	3.84	478	[M+H]+	-	methylQuercetin O-hexoside	Flavonol	2600000	2340000	2270000	3010000	3860000	2170000	1800000	1970000	1650000	2.40333e+06	3435000	1985000	1810000
Rhs233	Positive	479.1	302.8	3.54	478.1	[M+H]+	-	Selgin 5-O-hexoside	Flavone	32900000	33400000	32300000	32700000	32000000	31800000	32100000	32600000	31300000	3.28667e+07	32350000	31950000	31950000
Rhs218	Positive	477.1	315.5	5.17	476.1	[M+H]+	-	O-methylChrysoeriol 5-O-hexoside	Flavone	9070000	10200000	7370000	6740000	7180000	5600000	5070000	5610000	6100000	8880000	6960000	5335000	5855000
Rhs166	Positive	463.1	313.9	3.96	462.1	[M+H]+	-	Chrysoeriol 5-O-hexoside	Flavone	603000	469000	521000	96100	86700	53500	41500	990000	927000	531000	91400	47500	958500
Rhs216	Positive	435.1	339.7	3.73	434.1	[M+H]+	-	Naringenin C-hexoside	Flavone C-glycosides	34200	21500	33300	21400	24900	15900	16800	69600	67500	29666.7	23150	16350	68550
Rhs235	Positive	565	317.8	4.17	564	[M+H]+	-	Selgin O-malonylhexoside	Flavone	65100	61600	75200	13700	16200	11900	8120	72300	66000	67300	14950	10010	69150
Rhs217	Positive	521	317.6	4.49	520	[M+H]+	-	Naringenin O-malonylhexoside	Flavanone	86900	78800	82600	167000	151000	123000	142000	53600	53900	82766.7	159000	132500	53750
Rhs183	Positive	565.2	499.3	3.67	564.2	[M+H]+	-	C-pentosyl-C-hexosyl-apigenin	Flavone C-glycosides	1010	1430	1440	2130	719	2610	2600	1310	1440	1293.33	1424.5	2605	1375
Rhs134	Positive	433.1	271.7	3.88	432.1	[M+H]+	-	Apigenin C-glucoside	Flavone C-glycosides	544000	548000	547000	5760	5370	8400	10900	1570000	1690000	546333	5565	9650	1630000
Rhs203	Positive	301.1	259.1	3.96	300.1	[M+H]+	C10098	Kaempferide	Flavonol	2140000	1810000	1730000	661000	871000	733000	706000	3260000	3190000	1.89333e+06	766000	719500	3225000
Rhs225	Positive	463.1	301.4	3	463.123	Protonated	-	Peonidin O-hexoside	Anthocyanins	3600000	2930000	3160000	401000	1120000	749000	663000	1630000	1400000	3230000	760500	706000	1515000
Rhs231	Positive	627.1	465.2	4.66	626.1	[M+H]+	-	Quercetin-3,4'-O-di-beta-glucopyranoside	Flavonol	28200	17800	15000	1510	4770	4420	1340	62700	59100	20333.3	3140	2880	60900
Rhs164	Positive	417.2	255.8	4.67	416.2	[M+H]+	-	Chrysin O-hexoside	Flavone	41900	48600	51700	6010	7980	10000	9630	62600	68300	47400	6995	9815	65450
Rhs221	Positive	419.1	383.9	3.79	418.1	[M+H]+	-	O-methylnaringenin C-pentoside	Flavone C-glycosides	97700	92000	105000	116000	128000	94500	99200	73800	84200	98233.3	122000	96850	79000
Rhs163	Positive	417.2	381.9	3.98	416.2	[M+H]+	-	Chrysin C-hexoside	Flavone C-glycosides	14100	19100	18300	16900	17600	28400	27400	28000	25300	17166.7	17250	27900	26650
Rhs206	Positive	449.1	300	3.47	448.1	[M+H]+	-	Luteolin 6-C-glucoside	Flavone C-glycosides	33600	29500	30200	42800	43400	30200	32600	33700	25000	31100	43100	31400	29350
Rhs204	Positive	509.3	347.9	3.47	508.3	[M+H]+	-	Limocitrin O-hexoside	Flavone	1290000	1150000	1060000	1230000	1150000	1540000	1530000	1330000	1340000	1.16667e+06	1190000	1535000	1335000
Rhs144	Positive	757.3	450.1	3.47	756.3	[M+H]+	-	C-hexosyl-apigenin O-hexosyl-O-hexoside	Flavone C-glycosides	6730	5820	5520	5640	5300	10500	15000	5900	6770	6023.33	5470	12750	6335
Rhs430	Negative	313.1	298.3	7.21	314.1	[M-H]-	-	Velutin	Flavone	20800	8770	17800	98.7	685	1640	2310	31900	24800	15790	391.85	1975	28350
Rhs236	Positive	347	288	4.25	346	[M+H]+	-	Spinacetin	Flavone	25600	12200	18900	25500	36200	28600	26500	8290	19500	18900	30850	27550	13895
Rhs265	Positive	567.3	406	3.9	566.3	[M+H]+	-	Tricin O-glycerylhexoside	Flavone	35800	49700	51200	84700	92400	45400	80100	62100	44500	45566.7	88550	62750	53300
Rhs219	Positive	477.2	328	5.28	476.2	[M+H]+	-	O-methylChrysoeriol 7-O-hexoside	Flavone	13800000	14500000	11000000	12700000	11200000	9040000	9380000	12000000	13000000	13100000	11950000	9210000	12500000
Rhs202	Positive	479.2	318	4.25	478.2	[M+H]+	-	Isorhamnetin O-hexoside	Flavonol	794000	769000	723000	442000	485000	368000	447000	560000	543000	762000	463500	407500	551500
Rhs108	Positive	331.1	315.8	5.58	330.1	[M+H]+	-	Tricin	Flavone	32000	32900	32500	27600	28600	28000	26000	39100	38800	32466.7	28100	27000	38950
Rhs232	Positive	477.1	315.6	3.22	477.1	Protonated	-	Rosinidin O-hexoside	Anthocyanins	4030000	3300000	3240000	6810000	6990000	3070000	3040000	5810000	6080000	3.52333e+06	6900000	3055000	5945000
Rhs107	Positive	449.1	287.3	2.45	449.1	Protonated	C08604	Cyanidin 3-O-glucoside (Kuromanin)	Anthocyanins	86000000	92900000	95300000	29500000	34300000	50100000	52900000	70600000	79100000	91400000	31900000	51500000	74850000
Rhs191	Positive	637.1	303.5	3.16	637.1	Protonated	-	Delphinidin O-malonyl-malonylhexoside	Anthocyanins	8650	4900	3790	5560	6860	5030	8270	3800	3170	5780	6210	6650	3485
Rhs224	Positive	301.1	273.6	3.86	301.1	Protonated	C08726	Peonidin	Anthocyanins	21900000	19700000	18500000	23000000	22400000	20000000	19400000	22100000	22000000	2.00333e+07	22700000	19700000	22050000
Rhs237	Positive	509.1	347.7	3.27	508.1	[M+H]+	-	Syringetin 3-O-hexoside	Flavonol	159000	160000	185000	201000	246000	303000	318000	79800	57400	168000	223500	310500	68600
Rhs213	Positive	581.2	287.3	3.6	580.2	[M+H]+	-	Luteolin O-hexosyl-O-pentoside	Flavone	10300	10300	8760	14400	12400	15000	16200	13900	11200	9786.67	13400	15600	12550
Rhs238	Positive	509.2	347.6	3.82	508.2	[M+H]+	-	Syringetin 5-O-hexoside	Flavone	78600	81300	72200	104000	93000	70100	93400	151000	150000	77366.7	98500	81750	150500
Rhs162	Positive	417.1	255.7	4.84	416.1	[M+H]+	-	Chrysin 5-O-glucoside (Toringin)	Flavone	32200	32000	38000	3660	3440	5830	5510	54600	48500	34066.7	3550	5670	51550
Rhs175	Positive	639.1	640	3.21	638.1	[M+H]+	-	Chrysoeriol O-glucuronic acid-O-hexoside	Flavone	49700	36600	30300	41300	38400	40900	37600	110000	118000	38866.7	39850	39250	114000
Rhs205	Positive	611.1	449.4	3.38	610.1	[M+H]+	-	Luteolin 3',7-di-O-glucoside	Flavone	58100	51100	39100	44500	41200	49000	56300	56900	62000	49433.3	42850	52650	59450
Rhs130	Positive	461.1	257.4	3.7	460.1	[M+H]+	-	Acacetin O-glucuronic acid	Flavone	41000	36500	38700	2230	2950	10600	13700	93600	107000	38733.3	2590	12150	100300
Rhs178	Positive	771.1	463.2	3.71	770.1	[M+H]+	-	Chrysoeriol O-hexosyl-O-rutinoside	Flavone	8120	9510	9010	5960	8630	10000	9090	19000	11500	8880	7295	9545	15250
Rhs200	Positive	479.2	317.8	3.86	478.2	[M+H]+	-	Isorhamnetin 5-O-hexoside	Flavonol	2240000	2250000	2010000	2950000	3500000	1740000	1530000	1690000	1570000	2.16667e+06	3225000	1635000	1630000
Rhs170	Positive	609.4	301.7	3.93	608.4	[M+H]+	-	Chrysoeriol 7-O-rutinoside	Flavone	35000	23600	24500	15000	14600	12500	10700	84500	67000	27700	14800	11600	75750
Rhs177	Positive	595.1	301.8	3.94	594.1	[M+H]+	-	Chrysoeriol O-hexosyl-O-pentoside	Flavone	126000	127000	121000	5910	25700	97900	56100	396000	376000	124667	15805	77000	386000
Rhs239	Positive	509.3	283.6	4.02	508.3	[M+H]+	-	Syringetin 7-O-hexoside	Flavone	215000	155000	176000	75500	99100	98100	74400	186000	182000	182000	87300	86250	184000
Rhs106	Positive	433.1	271.7	4.05	432.1	[M+H]+	C04608	Apigenin 7-O-glucoside (Cosmosiin)	Flavone	260000	267000	282000	140000	147000	142000	124000	523000	387000	269667	143500	133000	455000
Rhs174	Positive	477.1	287	4.12	476.1	[M+H]+	-	Chrysoeriol O-glucuronic acid	Flavone	9870	9140	9250	2960	3610	1030	1220	13200	15800	9420	3285	1125	14500
Rhs179	Positive	549.1	301.7	4.43	548.1	[M+H]+	-	Chrysoeriol O-malonylhexoside	Flavone	4160	3840	3890	2060	3060	2770	2370	4980	3650	3963.33	2560	2570	4315
Rhs131	Positive	757.1	594.9	2.5	756.1	[M+H]+	-	Apigenin 6-C-hexosyl-8-C-hexosyl-O-hexoside	Flavone C-glycosides	16400	19000	15900	9	9	9	9	39400	45900	17100	9	9	42650
Rhs158	Positive	743.1	743.7	2.62	742.1	[M+H]+	-	C-hexosyl-luteolin O-hexosyl-O-pentoside	Flavone C-glycosides	1450	1080	1120	1040	686	473	9	1260	1720	1216.67	863	241	1490
Rhs126	Positive	627.1	430	2.65	626.1	[M+H]+	-	8-C-hexosyl-hesperetin O-hexoside	Flavone C-glycosides	11200000	9710000	9360000	12300000	11300000	11400000	11400000	14100000	14800000	10090000	11800000	11400000	14450000
Rhs168	Positive	787.1	344.1	2.75	786.1	[M+H]+	-	Chrysoeriol 6-C-hexoside 8-C-hexoside-O-hexoside	Flavone C-glycosides	207000	198000	186000	268000	274000	412000	394000	328000	333000	197000	271000	403000	330500
Rhs152	Positive	641.1	623	2.77	640.1	[M+H]+	-	C-hexosyl-isorhamnetin O-hexoside	Flavone C-glycosides	14600	14600	8740	9	5700	1600	2490	1970	2200	12646.7	2854.5	2045	2085
Rhs157	Positive	611.2	412.3	2.8	610.2	[M+H]+	-	C-hexosyl-luteolin O-hexoside	Flavone C-glycosides	5850	5650	3130	15200	14800	8180	9970	1640	1090	4876.67	15000	9075	1365
Rhs113	Positive	625.2	398.1	2.84	624.2	[M+H]+	-	6-C-hexosyl chrysoeriol O-hexoside	Flavone C-glycosides	19400	22900	15700	6950	8160	3970	4100	27900	30600	19333.3	7555	4035	29250
Rhs120	Positive	611.1	329	2.9	610.1	[M+H]+	-	6-C-hexosyl-luteolin O-hexoside	Flavone C-glycosides	5610	5910	4040	2560	4730	2500	3380	5010	4430	5186.67	3645	2940	4720
Rhs167	Positive	463.1	379.6	2.98	462.1	[M+H]+	-	Chrysoeriol 6-C-hexoside	Flavone C-glycosides	5690	2460	4490	3050	2030	6410	5070	5130	6470	4213.33	2540	5740	5800
Rhs209	Positive	449.1	329.6	3.32	448.1	[M+H]+	-	Luteolin C-hexoside	Flavone C-glycosides	37300	33700	32500	32700	34800	19800	21300	22300	18800	34500	33750	20550	20550
Rhs119	Positive	627.1	447.3	3.33	626.1	[M+H]+	-	6-C-hexosyl-hesperetin O-hexoside	Flavone C-glycosides	134000	122000	104000	111000	78200	95500	119000	227000	207000	120000	94600	107250	217000
Rhs173	Positive	609.1	463.4	3.6	608.1	[M+H]+	-	Chrysoeriol C-hexosyl-O-rhamnoside	Flavone C-glycosides	4810000	3510000	2790000	3260000	3860000	3130000	2920000	3190000	2770000	3.70333e+06	3560000	3025000	2980000
Rhs127	Positive	611.1	299.8	3.64	610.1	[M+H]+	-	8-C-hexosyl-luteolin O-hexoside	Flavone C-glycosides	211000	172000	145000	191000	220000	211000	200000	120000	142000	176000	205500	205500	131000
Rhs208	Positive	611.2	299.8	3.67	610.2	[M+H]+	-	Luteolin 8-C-hexosyl-O-hexoside	Flavone C-glycosides	225000	248000	196000	255000	257000	337000	378000	211000	206000	223000	256000	357500	208500
Rhs115	Positive	771.1	367.9	3.89	770.1	[M+H]+	-	6-C-hexosyl-apigenin O-feruloylhexoside	Flavone C-glycosides	5150	8110	7380	4550	7210	8410	5820	13000	12200	6880	5880	7115	12600
Rhs146	Positive	741.2	740.9	4.11	740.2	[M+H]+	-	C-hexosyl-apigenin O-p-coumaroylhexoside	Flavone C-glycosides	8690	13200	9470	5750	7320	8260	5200	5100	4610	10453.3	6535	6730	4855
Rhs121	Positive	625	397.8	3.31	624	[M+H]+	-	8-C-hexosyl chrysoeriol O-hexoside	Flavone C-glycosides	119000	104000	108000	126000	140000	151000	182000	212000	246000	110333	133000	166500	229000
Rhs118	Positive	801.1	783	3.82	800.1	[M+H]+	-	6-C-hexosyl-chrysoeriol O-feruloylhexoside	Flavone C-glycosides	2400	3460	3290	7930	8370	6590	6580	1570	1510	3050	8150	6585	1540
Rhs227	Positive	713.1	713.1	2.83	712.1	[M+H]+	-	Quercetin 5-O-malonylhexosyl-hexoside	Flavonol	3570	4560	4010	2490	5300	2240	3680	648	976	4046.67	3895	2960	812
Rhs229	Positive	611.2	303.7	3.73	610.2	[M+H]+	-	Quercetin 7-O-rutinoside	Flavonol	1460000	1370000	1320000	1080000	1170000	1710000	1700000	1450000	1270000	1.38333e+06	1125000	1705000	1360000
Rhs253	Positive	655.2	331.7	3.11	654.2	[M+H]+	-	Tricin 5-O-hexosyl-O-hexoside	Flavone	12800000	12200000	10800000	14600000	16500000	14400000	13300000	18000000	16700000	1.19333e+07	15550000	13850000	17350000
Rhs259	Positive	655.2	331.7	3.35	654.2	[M+H]+	-	Tricin 7-O-hexosyl-O-hexoside	Flavone	20200000	18500000	18500000	21200000	22000000	23900000	24100000	26700000	27200000	1.90667e+07	21600000	24000000	26950000
Rhs271	Positive	477.1	331.8	4.82	476.1	[M+H]+	-	Tricin O-rhamnoside	Flavone	13700	15700	11100	13400	8950	9100	6330	8710	10700	13500	11175	7715	9705
Rhs252	Positive	669.1	669	3.67	668.1	[M+H]+	-	Tricin 5-O-feruloylhexoside	Flavone	15900	14100	15200	20100	12000	11200	9670	24300	24700	15066.7	16050	10435	24500
Rhs260	Positive	527.1	331.7	5.27	526.1	[M+H]+	-	Tricin 7-O-β-guaiacylglycerol	Flavonolignan	1370	1790	734	2020	1710	1390	919	1470	1490	1298	1865	1154.5	1480
Rhs412	Negative	315.1	153.2	2.55	316.1	[M-H]-	-	Protocatechuic acid O-glucoside	Catechin derivatives	378000	338000	371000	42400	47300	75700	93900	714000	714000	362333	44850	84800	714000
Rhs377	Negative	865.1	407.2	3.46	866.1	[M-H]-	-	Catechin-catechin-catechin	Catechin derivatives	995000	647000	969000	1410000	1070000	1270000	1320000	947000	881000	870333	1240000	1295000	914000
Rhs396	Negative	465.1	285.3	2.41	466.1	[M-H]-	-	Cyanidin O-syringic acid	Anthocyanins	38500000	29400000	42900000	11600000	11700000	21800000	22700000	37800000	37600000	3.69333e+07	11650000	22250000	37700000
Rhs411	Negative	547.1	503.4	2.87	548.1	[M-H]-	-	Peonidin O-malonylhexoside	Anthocyanins	9560	9350	6220	7190	7920	13700	13400	11900	10500	8376.67	7555	13550	11200
Rhs401	Negative	625.1	463.4	2.18	626.1	[M-H]-	-	Hesperetin C-hexoside O-hexoside	Flavone C-glycosides	188000	146000	159000	207000	192000	259000	269000	360000	366000	164333	199500	264000	363000
Rhs379	Negative	740.1	431.2	3.2	741.1	[M-H]-	-	Chrysoeriol 6-C-pentosyl-O-rutinoside	Flavone C-glycosides	4630	4800	4890	9	9	1080	1660	19700	20600	4773.33	9	1370	20150
Rhs402	Negative	477.1	357.3	3.39	478.1	[M-H]-	-	Hesperetin O-Glucuronic acid	Flavanone	76700	100000	70600	64900	66400	77400	69500	97500	99600	82433.3	65650	73450	98550
Rhs384	Negative	755.1	311.4	3.56	756.1	[M-H]-	-	Chrysoeriol C-pentosyl-O-hexosyl-O-hexoside	Flavone C-glycosides	35200	12300	37400	7040	7460	3270	5520	5200	3920	28300	7250	4395	4560
Rhs375	Negative	563.1	269.3	3.88	564.1	[M-H]-	-	Apigenin O-hexosyl-O-pentoside	Flavone	178000	159000	143000	129000	108000	165000	157000	186000	166000	160000	118500	161000	176000
Rhs404	Negative	549.2	387.3	3.93	550.2	[M-H]-	-	Hesperetin O-malonylhexoside	Flavanone	58800	44000	43200	76500	73000	59200	57000	46300	42400	48666.7	74750	58100	44350
Rhs385	Negative	723.1	311.3	4.54	724.1	[M-H]-	-	Chrysoeriol C-pentosyl-O-rhamnosyl-rhamnoside	Flavone C-glycosides	1850	3570	1870	2620	2390	2580	3350	2830	1480	2430	2505	2965	2155
Rhs371	Negative	487.1	283.2	2.93	488.1	[M-H]-	-	Acacetin O-acetyl hexoside	Flavone	70300	59200	65700	104000	97500	114000	115000	58500	63400	65066.7	100750	114500	60950
Rhs390	Negative	799.1	461.3	3.83	800.1	[M-H]-	-	Chrysoeriol O-hexosyl-O-hexosyl-O-Glucuronic acid	Flavone	20200	15000	17900	38300	38800	24500	24400	6900	7200	17700	38550	24450	7050
Rhs386	Negative	503.1	341.3	3.88	504.1	[M-H]-	-	Chrysoeriol O-acetylhexoside	Flavone	29500	13700	22200	11800	6620	18300	18000	18500	17800	21800	9210	18150	18150
Rhs380	Negative	461.1	460.9	4.17	462.1	[M-H]-	-	Chrysoeriol 7-O-hexoside	Flavone	104000	117000	94200	193000	150000	163000	141000	120000	112000	105067	171500	152000	116000
Rhs405	Negative	519.1	315.3	4.22	520.1	[M-H]-	-	Isorhamnetin O-acetyl-hexoside	Flavonol	72100	150000	68600	9210	6060	4050	9610	100000	76700	96900	7635	6830	88350
Rhs407	Negative	641.1	285.2	4.51	642.1	[M-H]-	-	Luteolin O-eudesmic acid-O-hexoside	Flavone	8410	7680	12000	16300	12700	12200	11700	8500	8670	9363.33	14500	11950	8585
Rhs399	Negative	449.1	329.3	3.21	450.1	[M-H]-	-	Eriodictyol C-hexoside	Flavone C-glycosides	3190000	4780000	3420000	799000	819000	779000	756000	7960000	8300000	3.79667e+06	809000	767500	8130000
Rhs413	Negative	505.1	301.2	3.87	506.1	[M-H]-	-	Quercetin O-acetylhexoside	Flavonol	524000	182000	475000	71300	56000	85700	80900	99400	111000	393667	63650	83300	105200
Rhs429	Negative	535	329.4	3.68	536	[M-H]-	-	Tricin O-sinapic acid	Flavone	15800	12800	16900	20700	19000	25200	22600	23200	18900	15166.7	19850	23900	21050
Rhs428	Negative	521.1	329.3	3.68	522.1	[M-H]-	-	Tricin O-saccharic acid	Flavone	182000	284000	181000	118000	132000	97000	93500	275000	269000	215667	125000	95250	272000
Rhs418	Negative	491.1	329.3	3.9	492.1	[M-H]-	-	Tricin 5-O-hexoside	Flavone	201000	128000	215000	172000	144000	243000	254000	554000	528000	181333	158000	248500	541000
Rhs423	Negative	505.1	330.3	4.11	506.1	[M-H]-	-	Tricin O-glucuronic acid	Flavone	10400	13200	8520	11700	12100	7010	13600	10500	10700	10706.7	11900	10305	10600
Rhs420	Negative	491.1	431.2	4.14	492.1	[M-H]-	-	Tricin 7-O-hexoside	Flavone	499000	499000	465000	194000	209000	187000	184000	337000	361000	487667	201500	185500	349000
Rhs398	Negative	561.1	271.3	3.55	562.1	[M-H]-	-	Epicatechin-epiafzelechin	Catechin derivatives	39700	27100	45000	64500	66900	61900	53800	30300	28200	37266.7	65700	57850	29250
Rhs397	Negative	329.1	314.3	5.76	330.1	[M-H]-	-	Di-O-methylquercetin	Flavonol	186000	159000	169000	257000	239000	93500	91200	89500	82100	171333	248000	92350	85800
Rhs370	Negative	299.1	74.8	6.58	300.1	[M-H]-	-	4'-Hydroxy-5,7-dimethoxyflavanone	Flavanone	109000	70100	165000	53100	51700	69000	72900	44400	58000	114700	52400	70950	51200
Rhs318	Negative	609.2	301.3	4.09	610.19	[M-H]-	C09806	Hesperetin 7-O-neohesperidoside (Neohesperidin)	Flavanone	150000	99200	148000	57900	60400	105000	120000	177000	151000	132400	59150	112500	164000
Rhs69	Positive	287.1	287.1	4.91	286.1	[M+H]+	C01514	Luteolin	Flavone	611000	521000	542000	857000	949000	526000	570000	342000	322000	558000	903000	548000	332000
Rhs56	Positive	287	287	5.52	286.048	[M+H]+	C05903	Kaempferol	Flavonol	89500	83500	73300	35900	33800	29300	33100	130000	111000	82100	34850	31200	120500
Rhs27	Positive	291.1	139.1	2.81	290.079	[M+H]+	C06562	Catechin	Catechin derivatives	26800000	24600000	24100000	28500000	28300000	24300000	24500000	22800000	22400000	2.51667e+07	28400000	24400000	22600000
Rhs94	Positive	611.2	303	3.51	610.153	[M+H]+	C05625	Quercetin 3-O-rutinoside (Rutin)	Flavonol	1460000	1490000	1170000	1280000	1080000	1840000	2080000	1180000	1200000	1.37333e+06	1180000	1960000	1190000
Rhs294	Negative	537.1	537	5.79	538.09	[M-H]-	C10018	Amentoflavone	Flavone	18000	19400	16700	225	214	431	602	11000	1480	18033.3	219.5	516.5	6240
Rhs28	Positive	255.1	69.7	6.73	254.058	[M+H]+	C10028	Chrysin	Flavone	407000	402000	375000	6950	8470	29500	30000	417000	401000	394667	7710	29750	409000
Rhs77	Positive	581.2	57.1	3.92	580.179	[M+H]+	C09789	Naringenin 7-O-neohesperidoside (Naringin)	Flavanone	14000	12400	8970	1950	6120	3200	1570	12700	12900	11790	4035	2385	12800
Rhs22	Positive	579.2	271.1	3.89	578.164	[M+H]+	C12627	Apigenin 7-O-neohesperidoside (Rhoifolin)	Flavone	379000	379000	337000	492000	480000	336000	295000	244000	254000	365000	486000	315500	249000
Rhs21	Positive	433.1	313.1	3.73	432.106	[M+H]+	-	Apigenin 5-O-glucoside	Flavone	40900	31500	31800	1890	1230	2290	2510	98900	101000	34733.3	1560	2400	99950
Rhs10	Positive	435.1	303	3.91	434.085	[M+H]+	-	Quercetin 3-alpha-L-arabinofuranoside (Avicularin)	Flavonol	31000000	32300000	27900000	29300000	31400000	31200000	31200000	24800000	25500000	30400000	30350000	31200000	25150000
Rhs6	Positive	301.1	286.1	5.56	300.063	[M+H]+	C04293	Chrysoeriol	Flavone	131000	134000	133000	47300	45500	31500	31000	264000	244000	132667	46400	31250	254000
Rhs23	Positive	579.2	271.1	3.82	578.164	[M+H]+	-	Apigenin 7-rutinoside (Isorhoifolin)	Flavone	445000	444000	369000	478000	456000	336000	341000	237000	264000	419333	467000	338500	250500
Rhs62	Positive	595.2	287.1	3.77	594.159	[M+H]+	-	Kaempferol 3-O-rutinoside (Nicotiflorin)	Flavonol	79500	98300	59000	29100	33200	66900	69400	48100	51200	78933.3	31150	68150	49650
Rhs76	Positive	435.1	273.1	4.05	434.121	[M+H]+	C09099	Naringenin 7-O-glucoside (Prunin)	Flavanone	3510000	3540000	3580000	4450000	3480000	4190000	4530000	4880000	5570000	3.54333e+06	3965000	4360000	5225000
Rhs75	Positive	273.1	153.1	5.41	272.068	[M+H]+	C00509	Naringenin	Flavanone	16600000	14600000	14600000	21500000	21200000	16700000	17100000	10800000	11000000	1.52667e+07	21350000	16900000	10900000
Rhs4	Positive	271.1	215.1	5.48	270.053	[M+H]+	C01477	Apigenin	Flavone	284000	258000	235000	358000	384000	216000	212000	383000	311000	259000	371000	214000	347000
Rhs85	Positive	275.1	107	5.34	274.084	[M+H]+	C00774	Phloretin	Flavanone	38400	36800	36100	40600	41300	32600	30000	28100	34400	37100	40950	31300	31250
Rhs288	Negative	123.1	122.9	3.99	124.052	[M-H]-	C06730	4-Methylcatechol	Catechin derivatives	12000	14400	11800	10800	11600	10800	13500	15700	13000	12733.3	11200	12150	14350
Rhs87	Positive	577	287.9	3.67	576.127	[M+H]+	-	Procyanidin A1	Proanthocyanidins	1300000	1060000	1180000	877000	1090000	659000	648000	989000	1120000	1180000	983500	653500	1054500
Rhs88	Positive	577	425.9	3.94	576.127	[M+H]+	C10237	Procyanidin A2	Proanthocyanidins	733000	590000	718000	602000	731000	487000	402000	518000	513000	680333	666500	444500	515500
Rhs352	Negative	577	407.3	3.08	578.142	[M-H]-	-	Procyanidin B2	Proanthocyanidins	35900000	35100000	37100000	40800000	40600000	33900000	33800000	32300000	32400000	3.60333e+07	40700000	33850000	32350000
Rhs353	Negative	577.1	407.3	2.87	578.142	[M-H]-	-	Procyanidin B3	Proanthocyanidins	33400000	31800000	33300000	37100000	37000000	30900000	30800000	29300000	29400000	3.28333e+07	37050000	30850000	29350000
Rhs34	Positive	303	149.3	2.9	303.24	Protonated	C05908	Delphinidin	Anthocyanins	124000	131000	129000	69500	48800	41600	40600	208000	168000	128000	59150	41100	188000
Rhs72	Positive	493	331.7	2.81	493	Protonated	-	Malvidin 3-O-galactoside	Anthocyanins	68700000	61000000	65700000	96400000	94900000	90300000	90700000	79700000	78700000	6.51333e+07	95650000	90500000	79200000
Rhs9	Positive	493.2	331.6	2.86	493.2	Protonated	C12140	Malvidin 3-O-glucoside (Oenin)	Anthocyanins	57200000	48000000	48700000	78300000	79300000	76300000	73500000	65700000	65300000	51300000	78800000	74900000	65500000
Rhs67	Positive	291	139.1	3.17	290.3	[M+H]+	C09727	L-Epicatechin	Catechin derivatives	22000000	19400000	18700000	23000000	23300000	18900000	18900000	14300000	14400000	2.00333e+07	23150000	18900000	14350000
Rhs35	Positive	465.1	303.1	2.3	465.1	Protonated	C12138	Delphinidin 3-O-glucoside (Mirtillin)	Anthocyanins	27500000	24600000	30100000	44000000	45900000	56600000	53400000	38800000	41400000	27400000	44950000	55000000	40100000
Rhs73	Positive	319	319	4.39	318.038	[M+H]+	C10107	Myricetin	Flavonol	1620000	1490000	1690000	4800000	4990000	3890000	3880000	273000	308000	1600000	4895000	3885000	290500
Rhs308	Negative	457.2	169.1	3.18	458.085	[M-H]-	C09731	Epigallate catechin gallate (EGCG)	Catechin derivatives	107000	83000	76900	134000	79500	72800	68400	71600	60400	88966.7	106750	70600	66000
Rhs65	Positive	315.1	300	7.16	314.079	[M+H]+	-	Kumatakenin	Flavonol	34900	33700	33000	993	2000	3820	2460	54600	44400	33866.7	1496.5	3140	49500
Rhs298	Negative	269.1	251.1	5.8	270.053	[M-H]-	C10023	Baicalein (5,6,7-Trihydroxyflavone)	Flavone	3650	5000	3480	2050	1740	2510	3730	5890	6110	4043.33	1895	3120	6000
Rhs40	Positive	307	139.1	2.64	306	[M+H]+	C12136	Epigallocatechin (EGC)	Catechin derivatives	22500000	20500000	20200000	27200000	27900000	25500000	25000000	11400000	11500000	2.10667e+07	27550000	25250000	11450000
Rhs79	Positive	403.1	373.1	6.84	402.132	[M+H]+	C10112	Nobiletin	Flavone	5380	5990	7700	48300	2030	3670	3570	3660	4530	6356.67	25165	3620	4095
Rhs38	Positive	305.1	153	3.94	304.058	[M+H]+	C01617	Dihydroquercetin (Taxifolin)	Flavonol	16500000	16300000	14400000	18200000	18700000	9890000	11500000	9840000	10200000	1.57333e+07	18450000	10695000	10020000
Rhs11	Positive	307	248.1	2.36	306.074	[M+H]+	C12127	(+)-Gallocatechin (GC)	Catechin derivatives	15900000	15800000	15300000	19300000	20100000	17900000	17200000	9130000	9470000	1.56667e+07	19700000	17550000	9300000
Rhs54	Positive	625.2	317.1	3.64	624.169	[M+H]+	-	Isorhamnetin 3-O-neohesperidoside	Flavonol	318000	297000	263000	276000	273000	222000	207000	441000	333000	292667	274500	214500	387000
Rhs3	Positive	285.1	284.9	6.77	284.069	[M+H]+	C01470	Acacetin	Flavone	22400	21700	19300	20100	20200	11200	11000	15200	13800	21133.3	20150	11100	14500
Rhs299	Negative	445.1	269	4.33	446.085	[M-H]-	C10025	Baicalein-7-O-glucuronide (Baicalin)	Flavone	15900	10900	13700	11400	8000	12200	11900	14400	10800	13500	9700	12050	12600
Rhs101	Positive	373.1	373.1	7.32	372.121	[M+H]+	C10190	Tangeretin	Flavone	4250	5500	7160	27500	2590	5200	5330	4160	4270	5636.67	15045	5265	4215
Rhs74	Positive	465.1	303.2	3.63	464.096	[M+H]+	C10108	Myricetin 3-O-rhamnoside (Myricitrin)	Flavonol	17800000	15500000	16200000	19000000	19300000	16400000	13700000	15900000	16500000	16500000	19150000	15050000	16200000
Rhs307	Negative	441.3	289.1	3.73	442.3	[M-H]-	-	Epicatechin gallate (ECG)	Catechin derivatives	54500	49400	56800	59700	43500	40600	42100	61600	44200	53566.7	51600	41350	52900
Rhs80	Positive	287	241.1	4.83	286.048	[M+H]+	C10510	Orobol (5,7,3',4'-tetrahydroxyisoflavone)	Isoflavone	77000	67400	71000	92800	90400	68400	68500	53600	41200	71800	91600	68450	47400
Rhs45	Positive	271.1	215.1	5.45	270.053	[M+H]+	C06563	Genistein (4',5,7-Trihydroxyisoflavone)	Isoflavone	11400	11900	11600	15000	11700	7640	6640	15400	15300	11633.3	13350	7140	15350
Rhs41	Positive	289.1	153.1	4.85	288.063	[M+H]+	C05631	Eriodictyol	Flavanone	2060000	1800000	1750000	4340000	4350000	2270000	2320000	758000	771000	1870000	4345000	2295000	764500
Rhs33	Positive	417.1	255.1	3.34	416.111	[M+H]+	C10216	Daidzein 7-O-glucoside (Daidzin)	Isoflavone	24600	49900	29200	7900	5160	6480	6840	52300	50000	34566.7	6530	6660	51150
Rhs53	Positive	317.1	317.2	5.64	316.058	[M+H]+	C10084	Isorhamnetin	Flavonol	29000	31800	25300	8970	13600	1330	1740	43600	51300	28700	11285	1535	47450
Rhs317	Negative	463.1	301.1	3.88	464.132	[M-H]-	-	Hesperetin 5-O-glucoside	Flavanone	82900000	86700000	82500000	74500000	71500000	76800000	75200000	76600000	77200000	8.40333e+07	73000000	76000000	76900000
Rhs17	Positive	303.1	167.1	6.07	302.079	[M+H]+	-	7-O-Methyleriodictyol	Flavanone	35300	33700	29300	7180	3150	5080	3370	26400	25500	32766.7	5165	4225	25950
Rhs61	Positive	595.2	287	3.7	594.159	[M+H]+	-	Kaempferol 3-O-robinobioside (Biorobin)	Flavonol	52100	72600	51400	13200	20300	41600	47100	40100	35800	58700	16750	44350	37950
Rhs432	Negative	433.1	433	3.6	434.121	[M-H]-	-	Isohemiphloin	Flavone	114000	168000	121000	25300	14900	40000	35400	221000	220000	134333	20100	37700	220500
Rhs281	Negative	447.1	287.1	4.03	448.101	[M-H]-	C12249	Kaempferol 3-O-glucoside (Astragalin)	Flavonol	52600000	52600000	55100000	58900000	62400000	52600000	51800000	53000000	52200000	5.34333e+07	60650000	52200000	52600000
Rhs8	Positive	433.1	313.1	3.61	432.106	[M+H]+	C01714	Isovitexin	Flavone C-glycosides	732000	678000	661000	7950	7780	11200	12300	2110000	2180000	690333	7865	11750	2145000
Rhs98	Positive	287.1	287.1	6.73	286.084	[M+H]+	C09833	sakuranetin	Flavone	128000	124000	112000	11300	3680	10900	7500	112000	106000	121333	7490	9200	109000
Rhs31	Positive	595	287.9	2.6	595	Protonated	C08620	Cyanidin 3-O-rutinoside (Keracyanin)	Anthocyanins	1730000	1680000	1530000	2000000	2010000	1200000	1230000	371000	365000	1.64667e+06	2005000	1215000	368000
Rhs30	Positive	611	287.7	2.26	611	Protonated	C08639	Cyanidin 3,5-O-diglucoside (Cyanin)	Anthocyanins	80100000	73700000	74600000	68200000	70400000	75200000	78500000	113000000	110000000	7.61333e+07	69300000	76850000	111500000
Rhs83	Positive	595	271.8	2.45	595	Protonated	C08725	Pelargonin	Anthocyanins	633000	545000	542000	242000	275000	273000	271000	1740000	1790000	573333	258500	272000	1765000
Rhs277	Negative	301.1	242.1	5.63	302.079	[M-H]-	C01709	Hesperetin	Flavanone	11300	5510	9240	21700	24600	7930	8430	7630	6750	8683.33	23150	8180	7190
Rhs70	Positive	449.1	287.1	3.7	448.101	[M+H]+	C03951	Luteolin 7-O-glucoside (Cynaroside)	Flavone	761000	737000	708000	521000	446000	431000	553000	821000	718000	735333	483500	492000	769500
Rhs91	Positive	139.1	93	2.99	138.032	[M+H]+	C16700	Protocatechuic aldehyde	Catechin derivatives	196000	200000	203000	227000	212000	161000	178000	220000	165000	199667	219500	169500	192500
Rhs90	Positive	155	137	2.42	154.027	[M+H]+	C00230	Protocatechuic acid	Catechin derivatives	16800	12500	13300	35800	37900	19100	18400	13100	12600	14200	36850	18750	12850
Rhs57	Positive	579.2	433.1	3.67	578.164	[M+H]+	C16981	Kaempferol 3,7-dirhamnoside (Kaempferitrin)	Flavonol	1180000	1050000	878000	1270000	1250000	1000000	992000	729000	755000	1036000	1260000	996000	742000
Rhs37	Positive	321.1	153.1	3.36	320.053	[M+H]+	C02906	Dihydromyricetin	Flavonol	3650000	3680000	3600000	5610000	5440000	4320000	4290000	2660000	2610000	3.64333e+06	5525000	4305000	2635000
Rhs319	Negative	609.2	301.1	3.99	610.19	[M-H]-	C09755	Hesperetin 7-rutinoside (Hesperidin)	Flavanone	28800	33800	29000	14700	15200	19500	23700	29600	28900	30533.3	14950	21600	29250
Rhs93	Positive	303	303	4.92	302.043	[M+H]+	C00389	Quercetin	Flavonol	2310000	2000000	2160000	1700000	1870000	1420000	1610000	1810000	1740000	2.15667e+06	1785000	1515000	1775000
Rhs78	Positive	273.1	153.1	5.3	272.069	[M+H]+	C06561	Naringenin chalcone	Flavanone	633000	751000	576000	630000	641000	597000	639000	1630000	1760000	653333	635500	618000	1695000
Rhs297	Negative	287.1	125.1	4.43	288.063	[M-H]-	C00974	Aromadedrin (Dihydrokaempferol)	Flavonol	5310000	5270000	4980000	4630000	4690000	3760000	3750000	8340000	7970000	5.18667e+06	4660000	3755000	8155000
Rhs320	Negative	675.2	513.2	4.83	676.237	[M-H]-	C17555	Icariin (kaempferol 3,7-O-diglucoside 8-prenyl derivative)	Flavonol	2070	5030	3140	727	1190	3380	1930	4360	4480	3413.33	958.5	2655	4420
Rhs103	Positive	347.3	285.4	6.47	346.251	[M+H]+	-	Troxerutin (Trihydroxyethyl rutin)	Flavonol	168000	156000	164000	231000	154000	197000	214000	150000	150000	162667	192500	205500	150000
Rhs86	Positive	257.1	153	6.85	256.074	[M+H]+	C09827	Pinocembrin (Dihydrochrysin)	Flavanone	188000	172000	173000	52600	56000	42800	40000	205000	211000	177667	54300	41400	208000
Rhs325	Negative	593	285.2	4.85	594.195	[M-H]-	C09830	Isosakuranetin-7-neohesperidoside (Poncirin)	Flavanone	427000	693000	375000	206000	224000	115000	118000	510000	500000	498333	215000	116500	505000
Rhs359	Negative	463	301	4.03	464.096	[M-H]-	-	Quercetin 4'-O-glucoside (Spiraeoside)	Flavonol	48200000	59200000	47800000	44800000	46700000	47200000	45300000	45200000	45400000	5.17333e+07	45750000	46250000	45300000
Rhs316	Negative	445	282.1	3.42	446.121	[M-H]-	C16195	Glycitin	Isoflavone	217000	246000	173000	284000	222000	118000	100000	124000	135000	212000	253000	109000	129500
Rhs46	Positive	433	270.9	3.84	432.106	[M+H]+	C09126	Genistein 7-O-Glucoside (Genistin)	Isoflavone	385000	356000	370000	197000	207000	184000	186000	791000	596000	370333	202000	185000	693500
Rhs1	Positive	465	302.8	3.68	464.096	[M+H]+	C05623	Quercetin 3-O-glucoside (Isotrifoliin)	Flavonol	47400000	49900000	47100000	45300000	45200000	47500000	45500000	43500000	43700000	4.81333e+07	45250000	46500000	43600000
Rhs52	Positive	257	137.1	5.91	256.074	[M+H]+	C08650	Isoliquiritigenin	Flavanone	5420	8820	5490	7530	7480	4500	3920	3500	5360	6576.67	7505	4210	4430
Rhs366	Negative	577	413.1	3.49	578.164	[M-H]-	C12628	Vitexin 2''-O-beta-L-rhamnoside	Flavone C-glycosides	35900	40300	32600	33700	38100	21800	23500	27900	27600	36266.7	35900	22650	27750
Rhs24	Positive	285	270.2	7	284.069	[M+H]+	C00814	Biochanin A	Isoflavone	259000	236000	220000	2330	2070	12600	14800	221000	206000	238333	2200	13700	213500
Rhs315	Negative	283	268.1	4.89	284.069	[M-H]-	C14536	Glycitein	Isoflavone	8090	6540	9480	13600	14900	12600	11300	6350	5690	8036.67	14250	11950	6020
Rhs36	Positive	611	303	2.26	611	Protonated	C16315	Delphinidin 3-O-rutinoside (Tulipanin)	Anthocyanins	254000	237000	233000	357000	353000	300000	309000	422000	459000	241333	355000	304500	440500
Rhs289	Negative	269	241.1	4.32	270.053	[M-H]-	C14314	6-Hydroxydaidzein	Isoflavone	6480	6130	8100	7010	6090	4660	6920	9860	8970	6903.33	6550	5790	9415
Rhs284	Negative	269	225	4.37	270.053	[M-H]-	C02495	2'-Hydroxydaidzein	Isoflavone	18100	22800	14100	1660	2510	5260	2480	41800	45500	18333.3	2085	3870	43650
Rhs280	Negative	447	284	3.86	448.101	[M-H]-	C12626	Kaempferol 3-O-galactoside (Trifolin)	Flavonol	70700000	72800000	71000000	67000000	65000000	43600000	44700000	58900000	56700000	71500000	66000000	44150000	57800000
Rhs2	Positive	287	217.1	4.79	286.048	[M+H]+	C12134	2'-Hydroxygenistein	Isoflavone	363000	333000	316000	647000	617000	362000	394000	161000	156000	337333	632000	378000	158500
Rhs18	Positive	275	139.1	3.29	274.084	[M+H]+	C09320	Afzelechin (3,5,7,4'-Tetrahydroxyflavan)	Flavanone	30300	24500	24600	39900	47500	27300	27600	25300	22800	26466.7	43700	27450	24050
Rhs13	Positive	331	316	6.44	330.074	[M+H]+	C01265	3,7-Di-O-methylquercetin	Flavonol	44400	48500	48600	9	9	4090	3570	45000	51500	47166.7	9	3830	48250
Rhs282	Negative	283	268.1	6.95	284.069	[M-H]-	C10521	Prunetin	Isoflavone	80600	34300	76500	78900	95000	41000	41900	70600	63400	63800	86950	41450	67000
Rhs328	Negative	431	285.1	4.29	432.106	[M-H]-	C16911	Kaempferol 3-O-rhamnoside (Kaempferin)	Flavonol	33400000	30900000	34000000	21400000	21400000	22500000	22700000	33700000	33700000	3.27667e+07	21400000	22600000	33700000
Rhs365	Negative	301	149.1	4.38	302.043	[M-H]-	C10192	Tricetin	Flavone	300000	165000	225000	467000	306000	396000	352000	318000	423000	230000	386500	374000	370500
Rhs96	Positive	317	317	6.19	316.058	[M+H]+	C10176?	Rhamnetin (7-O-methxyl quercetin)	Flavonol	53300	45800	41600	97600	97700	52200	50000	34100	31500	46900	97650	51100	32800
Rhs84	Positive	479	317	2.42	479	Protonated	C12139	Petunidin 3-O-glucoside	Anthocyanins	17200000	16100000	17500000	27200000	29300000	28100000	26800000	21300000	22100000	1.69333e+07	28250000	27450000	21700000
Rhs82	Positive	433.1	271	2.58	433.1	Protonated	-	Pelargonidin 3-O-beta-D-glucoside（Callistephin chloride)	Anthocyanins	1590000	1530000	1650000	94900	97800	187000	190000	1320000	1410000	1590000	96350	188500	1365000
Rhs313	Negative	287	135.1	3.66	288.063	[M-H]-	C01378	Fustin	Flavonol	9110	8400	10300	15500	15400	8470	7690	7400	7480	9270	15450	8080	7440
Rhs99	Positive	447.1	285.1	5.1	446.121	[M+H]+	C05376	Sissotrin	Isoflavone	12900	10400	10900	1580	585	679	763	3930	2850	11400	1082.5	721	3390
Rhs100	Positive	347	287.1	5.59	346.069	[M+H]+	C11620	Syringetin	Flavonol	8060	7850	8750	13400	17500	6810	7360	9500	10900	8220	15450	7085	10200
Rhs334	Negative	331	316.1	4.96	332.053	[M-H]-	C12633	Laricitrin	Flavonol	64400	50900	65300	73500	82500	48600	55100	58300	54700	60200	78000	51850	56500
Rhs25	Positive	273.1	137.1	5.3	272.069	[M+H]+	C08578	Butein	Flavanone	3260	2460	2420	3110	3390	4580	3660	2000	2860	2713.33	3250	4120	2430
Rhs360	Negative	477.1	301.1	3.68	478.36	[M-H]-	-	Quercetin 7-O-β-D-Glucuronide	Flavonol	49100000	57800000	46100000	23100000	23400000	29000000	28600000	48700000	48000000	51000000	23250000	28800000	48350000
Rhs55	Positive	287.1	161.1	6.81	286.084	[M+H]+	C05334	Isosakuranetin (4'-Methylnaringenin)	Flavanone	1260000	1140000	1120000	2500000	2510000	876000	908000	511000	526000	1.17333e+06	2505000	892000	518500
Rhs332	Negative	739.2	593.3	3.28	740.216	[M-H]-	C10178	Kaempferol-3-O-robinoside-7-O-rhamnoside (Robinin)	Flavonol	19500	24000	15800	4770	9750	7080	9990	78000	79500	19766.7	7260	8535	78750
Rhs5	Positive	273.1	153.1	5.45	272.069	[M+H]+	C09614	Butin	Flavone	17200000	15800000	15000000	22000000	21400000	17400000	16900000	11200000	11400000	16000000	21700000	17150000	11300000
Rhs341	Negative	479.1	317.3	3.43	480.09	[M-H]-	-	Myricetin 3-O-galactoside	Flavonol	27700000	25300000	27300000	25300000	26000000	41200000	40500000	30100000	30300000	2.67667e+07	25650000	40850000	30200000
Rhs339	Negative	301	151.1	4.97	302.043	[M-H]-	C10105	Morin	Flavonol	20600000	16900000	20200000	19000000	22600000	15900000	16100000	17200000	17200000	1.92333e+07	20800000	16000000	17200000
Rhs29	Positive	287	231.6	3.45	287.24	Protonated	C05905	Cyanidin	Anthocyanins	209000	163000	160000	137000	149000	209000	206000	53000	76400	177333	143000	207500	64700
