# Supplementary material for: Metabolite analysis reveals flavonoids accumulation during flower development in Rhododendron pulchrum sweet (Ericaceae)
Source: PeerJ journal article supplement (doi:10.7717/peerj.17325), 2024-05-31
Supplement: Table_S1.xlsx [file Table_S1.xlsx]

## Sheet: all metabolisms
Table S1 All flavonoids identified by LC-ESI-MS/MS
Index	Ion mode	m/z		Rt (min)	Molecular Weight (Da)	Ionization model	KEGG ID	Compounds	Class
		precursor ions	main fragments ions
Rhs109	Positive	479	317.3	3.84	478	[M+H]+	-	methylQuercetin O-hexoside	Flavonol
Rhs233	Positive	479.1	302.8	3.54	478.1	[M+H]+	-	Selgin 5-O-hexoside	Flavone
Rhs218	Positive	477.1	315.5	5.17	476.1	[M+H]+	-	O-methylChrysoeriol 5-O-hexoside	Flavone
Rhs166	Positive	463.1	313.9	3.96	462.1	[M+H]+	-	Chrysoeriol 5-O-hexoside	Flavone
Rhs216	Positive	435.1	339.7	3.73	434.1	[M+H]+	-	Naringenin C-hexoside	Flavone C-glycosides
Rhs235	Positive	565	317.8	4.17	564	[M+H]+	-	Selgin O-malonylhexoside	Flavone
Rhs217	Positive	521	317.6	4.49	520	[M+H]+	-	Naringenin O-malonylhexoside	Flavanone
Rhs183	Positive	565.2	499.3	3.67	564.2	[M+H]+	-	C-pentosyl-C-hexosyl-apigenin	Flavone C-glycosides
Rhs134	Positive	433.1	271.7	3.88	432.1	[M+H]+	-	Apigenin C-glucoside	Flavone C-glycosides
Rhs203	Positive	301.1	259.1	3.96	300.1	[M+H]+	C10098	Kaempferide	Flavonol
Rhs225	Positive	463.1	301.4	3	463.123	Protonated	-	Peonidin O-hexoside	Anthocyanins
Rhs231	Positive	627.1	465.2	4.66	626.1	[M+H]+	-	Quercetin-3,4'-O-di-beta-glucopyranoside	Flavonol
Rhs164	Positive	417.2	255.8	4.67	416.2	[M+H]+	-	Chrysin O-hexoside	Flavone
Rhs221	Positive	419.1	383.9	3.79	418.1	[M+H]+	-	O-methylnaringenin C-pentoside	Flavone C-glycosides
Rhs163	Positive	417.2	381.9	3.98	416.2	[M+H]+	-	Chrysin C-hexoside	Flavone C-glycosides
Rhs206	Positive	449.1	300	3.47	448.1	[M+H]+	-	Luteolin 6-C-glucoside	Flavone C-glycosides
Rhs204	Positive	509.3	347.9	3.47	508.3	[M+H]+	-	Limocitrin O-hexoside	Flavone
Rhs144	Positive	757.3	450.1	3.47	756.3	[M+H]+	-	C-hexosyl-apigenin O-hexosyl-O-hexoside	Flavone C-glycosides
Rhs430	Negative	313.1	298.3	7.21	314.1	[M-H]-	-	Velutin	Flavone
Rhs236	Positive	347	288	4.25	346	[M+H]+	-	Spinacetin	Flavone
Rhs265	Positive	567.3	406	3.9	566.3	[M+H]+	-	Tricin O-glycerylhexoside	Flavone
Rhs219	Positive	477.2	328	5.28	476.2	[M+H]+	-	O-methylChrysoeriol 7-O-hexoside	Flavone
Rhs202	Positive	479.2	318	4.25	478.2	[M+H]+	-	Isorhamnetin O-hexoside	Flavonol
Rhs108	Positive	331.1	315.8	5.58	330.1	[M+H]+	-	Tricin	Flavone
Rhs232	Positive	477.1	315.6	3.22	477.1	Protonated	-	Rosinidin O-hexoside	Anthocyanins
Rhs107	Positive	449.1	287.3	2.45	449.1	Protonated	C08604	Cyanidin 3-O-glucoside (Kuromanin)	Anthocyanins
Rhs191	Positive	637.1	303.5	3.16	637.1	Protonated	-	Delphinidin O-malonyl-malonylhexoside	Anthocyanins
Rhs224	Positive	301.1	273.6	3.86	301.1	Protonated	C08726	Peonidin	Anthocyanins
Rhs237	Positive	509.1	347.7	3.27	508.1	[M+H]+	-	Syringetin 3-O-hexoside	Flavonol
Rhs213	Positive	581.2	287.3	3.6	580.2	[M+H]+	-	Luteolin O-hexosyl-O-pentoside	Flavone
Rhs238	Positive	509.2	347.6	3.82	508.2	[M+H]+	-	Syringetin 5-O-hexoside	Flavone
Rhs162	Positive	417.1	255.7	4.84	416.1	[M+H]+	-	Chrysin 5-O-glucoside (Toringin)	Flavone
Rhs175	Positive	639.1	640	3.21	638.1	[M+H]+	-	Chrysoeriol O-glucuronic acid-O-hexoside	Flavone
Rhs205	Positive	611.1	449.4	3.38	610.1	[M+H]+	-	Luteolin 3',7-di-O-glucoside	Flavone
Rhs130	Positive	461.1	257.4	3.7	460.1	[M+H]+	-	Acacetin O-glucuronic acid	Flavone
Rhs178	Positive	771.1	463.2	3.71	770.1	[M+H]+	-	Chrysoeriol O-hexosyl-O-rutinoside	Flavone
Rhs200	Positive	479.2	317.8	3.86	478.2	[M+H]+	-	Isorhamnetin 5-O-hexoside	Flavonol
Rhs170	Positive	609.4	301.7	3.93	608.4	[M+H]+	-	Chrysoeriol 7-O-rutinoside	Flavone
Rhs177	Positive	595.1	301.8	3.94	594.1	[M+H]+	-	Chrysoeriol O-hexosyl-O-pentoside	Flavone
Rhs239	Positive	509.3	283.6	4.02	508.3	[M+H]+	-	Syringetin 7-O-hexoside	Flavone
Rhs106	Positive	433.1	271.7	4.05	432.1	[M+H]+	C04608	Apigenin 7-O-glucoside (Cosmosiin)	Flavone
Rhs174	Positive	477.1	287	4.12	476.1	[M+H]+	-	Chrysoeriol O-glucuronic acid	Flavone
Rhs179	Positive	549.1	301.7	4.43	548.1	[M+H]+	-	Chrysoeriol O-malonylhexoside	Flavone
Rhs131	Positive	757.1	594.9	2.5	756.1	[M+H]+	-	Apigenin 6-C-hexosyl-8-C-hexosyl-O-hexoside	Flavone C-glycosides
Rhs158	Positive	743.1	743.7	2.62	742.1	[M+H]+	-	C-hexosyl-luteolin O-hexosyl-O-pentoside	Flavone C-glycosides
Rhs126	Positive	627.1	430	2.65	626.1	[M+H]+	-	8-C-hexosyl-hesperetin O-hexoside	Flavone C-glycosides
Rhs168	Positive	787.1	344.1	2.75	786.1	[M+H]+	-	Chrysoeriol 6-C-hexoside 8-C-hexoside-O-hexoside	Flavone C-glycosides
Rhs152	Positive	641.1	623	2.77	640.1	[M+H]+	-	C-hexosyl-isorhamnetin O-hexoside	Flavone C-glycosides
Rhs157	Positive	611.2	412.3	2.8	610.2	[M+H]+	-	C-hexosyl-luteolin O-hexoside	Flavone C-glycosides
Rhs113	Positive	625.2	398.1	2.84	624.2	[M+H]+	-	6-C-hexosyl chrysoeriol O-hexoside	Flavone C-glycosides
Rhs120	Positive	611.1	329	2.9	610.1	[M+H]+	-	6-C-hexosyl-luteolin O-hexoside	Flavone C-glycosides
Rhs167	Positive	463.1	379.6	2.98	462.1	[M+H]+	-	Chrysoeriol 6-C-hexoside	Flavone C-glycosides
Rhs209	Positive	449.1	329.6	3.32	448.1	[M+H]+	-	Luteolin C-hexoside	Flavone C-glycosides
Rhs119	Positive	627.1	447.3	3.33	626.1	[M+H]+	-	6-C-hexosyl-hesperetin O-hexoside	Flavone C-glycosides
Rhs173	Positive	609.1	463.4	3.6	608.1	[M+H]+	-	Chrysoeriol C-hexosyl-O-rhamnoside	Flavone C-glycosides
Rhs127	Positive	611.1	299.8	3.64	610.1	[M+H]+	-	8-C-hexosyl-luteolin O-hexoside	Flavone C-glycosides
Rhs208	Positive	611.2	299.8	3.67	610.2	[M+H]+	-	Luteolin 8-C-hexosyl-O-hexoside	Flavone C-glycosides
Rhs115	Positive	771.1	367.9	3.89	770.1	[M+H]+	-	6-C-hexosyl-apigenin O-feruloylhexoside	Flavone C-glycosides
Rhs146	Positive	741.2	740.9	4.11	740.2	[M+H]+	-	C-hexosyl-apigenin O-p-coumaroylhexoside	Flavone C-glycosides
Rhs121	Positive	625	397.8	3.31	624	[M+H]+	-	8-C-hexosyl chrysoeriol O-hexoside	Flavone C-glycosides
Rhs118	Positive	801.1	783	3.82	800.1	[M+H]+	-	6-C-hexosyl-chrysoeriol O-feruloylhexoside	Flavone C-glycosides
Rhs227	Positive	713.1	713.1	2.83	712.1	[M+H]+	-	Quercetin 5-O-malonylhexosyl-hexoside	Flavonol
Rhs229	Positive	611.2	303.7	3.73	610.2	[M+H]+	-	Quercetin 7-O-rutinoside	Flavonol
Rhs253	Positive	655.2	331.7	3.11	654.2	[M+H]+	-	Tricin 5-O-hexosyl-O-hexoside	Flavone
Rhs259	Positive	655.2	331.7	3.35	654.2	[M+H]+	-	Tricin 7-O-hexosyl-O-hexoside	Flavone
Rhs271	Positive	477.1	331.8	4.82	476.1	[M+H]+	-	Tricin O-rhamnoside	Flavone
Rhs252	Positive	669.1	669	3.67	668.1	[M+H]+	-	Tricin 5-O-feruloylhexoside	Flavone
Rhs260	Positive	527.1	331.7	5.27	526.1	[M+H]+	-	Tricin 7-O-β-guaiacylglycerol	Flavonolignan
Rhs412	Negative	315.1	153.2	2.55	316.1	[M-H]-	-	Protocatechuic acid O-glucoside	Catechin derivatives
Rhs377	Negative	865.1	407.2	3.46	866.1	[M-H]-	-	Catechin-catechin-catechin	Catechin derivatives
Rhs396	Negative	465.1	285.3	2.41	466.1	[M-H]-	-	Cyanidin O-syringic acid	Anthocyanins
Rhs411	Negative	547.1	503.4	2.87	548.1	[M-H]-	-	Peonidin O-malonylhexoside	Anthocyanins
Rhs401	Negative	625.1	463.4	2.18	626.1	[M-H]-	-	Hesperetin C-hexoside O-hexoside	Flavone C-glycosides
Rhs379	Negative	740.1	431.2	3.2	741.1	[M-H]-	-	Chrysoeriol 6-C-pentosyl-O-rutinoside	Flavone C-glycosides
Rhs402	Negative	477.1	357.3	3.39	478.1	[M-H]-	-	Hesperetin O-Glucuronic acid	Flavanone
Rhs384	Negative	755.1	311.4	3.56	756.1	[M-H]-	-	Chrysoeriol C-pentosyl-O-hexosyl-O-hexoside	Flavone C-glycosides
Rhs375	Negative	563.1	269.3	3.88	564.1	[M-H]-	-	Apigenin O-hexosyl-O-pentoside	Flavone
Rhs404	Negative	549.2	387.3	3.93	550.2	[M-H]-	-	Hesperetin O-malonylhexoside	Flavanone
Rhs385	Negative	723.1	311.3	4.54	724.1	[M-H]-	-	Chrysoeriol C-pentosyl-O-rhamnosyl-rhamnoside	Flavone C-glycosides
Rhs371	Negative	487.1	283.2	2.93	488.1	[M-H]-	-	Acacetin O-acetyl hexoside	Flavone
Rhs390	Negative	799.1	461.3	3.83	800.1	[M-H]-	-	Chrysoeriol O-hexosyl-O-hexosyl-O-Glucuronic acid	Flavone
Rhs386	Negative	503.1	341.3	3.88	504.1	[M-H]-	-	Chrysoeriol O-acetylhexoside	Flavone
Rhs380	Negative	461.1	460.9	4.17	462.1	[M-H]-	-	Chrysoeriol 7-O-hexoside	Flavone
Rhs405	Negative	519.1	315.3	4.22	520.1	[M-H]-	-	Isorhamnetin O-acetyl-hexoside	Flavonol
Rhs407	Negative	641.1	285.2	4.51	642.1	[M-H]-	-	Luteolin O-eudesmic acid-O-hexoside	Flavone
Rhs399	Negative	449.1	329.3	3.21	450.1	[M-H]-	-	Eriodictyol C-hexoside	Flavone C-glycosides
Rhs413	Negative	505.1	301.2	3.87	506.1	[M-H]-	-	Quercetin O-acetylhexoside	Flavonol
Rhs429	Negative	535	329.4	3.68	536	[M-H]-	-	Tricin O-sinapic acid	Flavone
Rhs428	Negative	521.1	329.3	3.68	522.1	[M-H]-	-	Tricin O-saccharic acid	Flavone
Rhs418	Negative	491.1	329.3	3.9	492.1	[M-H]-	-	Tricin 5-O-hexoside	Flavone
Rhs423	Negative	505.1	330.3	4.11	506.1	[M-H]-	-	Tricin O-glucuronic acid	Flavone
Rhs420	Negative	491.1	431.2	4.14	492.1	[M-H]-	-	Tricin 7-O-hexoside	Flavone
Rhs398	Negative	561.1	271.3	3.55	562.1	[M-H]-	-	Epicatechin-epiafzelechin	Catechin derivatives
Rhs397	Negative	329.1	314.3	5.76	330.1	[M-H]-	-	Di-O-methylquercetin	Flavonol
Rhs370	Negative	299.1	74.8	6.58	300.1	[M-H]-	-	4'-Hydroxy-5,7-dimethoxyflavanone	Flavanone
Rhs318	Negative	609.2	301.3	4.09	610.19	[M-H]-	C09806	Hesperetin 7-O-neohesperidoside (Neohesperidin)	Flavanone
Rhs69	Positive	287.1	287.1	4.91	286.1	[M+H]+	C01514	Luteolin	Flavone
Rhs56	Positive	287	287	5.52	286.048	[M+H]+	C05903	Kaempferol	Flavonol
Rhs27	Positive	291.1	139.1	2.81	290.079	[M+H]+	C06562	Catechin	Catechin derivatives
Rhs94	Positive	611.2	303	3.51	610.153	[M+H]+	C05625	Quercetin 3-O-rutinoside (Rutin)	Flavonol
Rhs294	Negative	537.1	537	5.79	538.09	[M-H]-	C10018	Amentoflavone	Flavone
Rhs28	Positive	255.1	69.7	6.73	254.058	[M+H]+	C10028	Chrysin	Flavone
Rhs77	Positive	581.2	57.1	3.92	580.179	[M+H]+	C09789	Naringenin 7-O-neohesperidoside (Naringin)	Flavanone
Rhs22	Positive	579.2	271.1	3.89	578.164	[M+H]+	C12627	Apigenin 7-O-neohesperidoside (Rhoifolin)	Flavone
Rhs21	Positive	433.1	313.1	3.73	432.106	[M+H]+	-	Apigenin 5-O-glucoside	Flavone
Rhs10	Positive	435.1	303	3.91	434.085	[M+H]+	-	Quercetin 3-alpha-L-arabinofuranoside (Avicularin)	Flavonol
Rhs6	Positive	301.1	286.1	5.56	300.063	[M+H]+	C04293	Chrysoeriol	Flavone
Rhs23	Positive	579.2	271.1	3.82	578.164	[M+H]+	-	Apigenin 7-rutinoside (Isorhoifolin)	Flavone
Rhs62	Positive	595.2	287.1	3.77	594.159	[M+H]+	-	Kaempferol 3-O-rutinoside (Nicotiflorin)	Flavonol
Rhs76	Positive	435.1	273.1	4.05	434.121	[M+H]+	C09099	Naringenin 7-O-glucoside (Prunin)	Flavanone
Rhs75	Positive	273.1	153.1	5.41	272.068	[M+H]+	C00509	Naringenin	Flavanone
Rhs4	Positive	271.1	215.1	5.48	270.053	[M+H]+	C01477	Apigenin	Flavone
Rhs85	Positive	275.1	107	5.34	274.084	[M+H]+	C00774	Phloretin	Flavanone
Rhs288	Negative	123.1	122.9	3.99	124.052	[M-H]-	C06730	4-Methylcatechol	Catechin derivatives
Rhs87	Positive	577	287.9	3.67	576.127	[M+H]+	-	Procyanidin A1	Proanthocyanidins
Rhs88	Positive	577	425.9	3.94	576.127	[M+H]+	C10237	Procyanidin A2	Proanthocyanidins
Rhs352	Negative	577	407.3	3.08	578.142	[M-H]-	-	Procyanidin B2	Proanthocyanidins
Rhs353	Negative	577.1	407.3	2.87	578.142	[M-H]-	-	Procyanidin B3	Proanthocyanidins
Rhs34	Positive	303	149.3	2.9	303.24	Protonated	C05908	Delphinidin	Anthocyanins
Rhs72	Positive	493	331.7	2.81	493	Protonated	-	Malvidin 3-O-galactoside	Anthocyanins
Rhs9	Positive	493.2	331.6	2.86	493.2	Protonated	C12140	Malvidin 3-O-glucoside (Oenin)	Anthocyanins
Rhs67	Positive	291	139.1	3.17	290.3	[M+H]+	C09727	L-Epicatechin	Catechin derivatives
Rhs35	Positive	465.1	303.1	2.3	465.1	Protonated	C12138	Delphinidin 3-O-glucoside (Mirtillin)	Anthocyanins
Rhs73	Positive	319	319	4.39	318.038	[M+H]+	C10107	Myricetin	Flavonol
Rhs308	Negative	457.2	169.1	3.18	458.085	[M-H]-	C09731	Epigallate catechin gallate (EGCG)	Catechin derivatives
Rhs65	Positive	315.1	300	7.16	314.079	[M+H]+	-	Kumatakenin	Flavonol
Rhs298	Negative	269.1	251.1	5.8	270.053	[M-H]-	C10023	Baicalein (5,6,7-Trihydroxyflavone)	Flavone
Rhs40	Positive	307	139.1	2.64	306	[M+H]+	C12136	Epigallocatechin (EGC)	Catechin derivatives
Rhs79	Positive	403.1	373.1	6.84	402.132	[M+H]+	C10112	Nobiletin	Flavone
Rhs38	Positive	305.1	153	3.94	304.058	[M+H]+	C01617	Dihydroquercetin (Taxifolin)	Flavonol
Rhs11	Positive	307	248.1	2.36	306.074	[M+H]+	C12127	(+)-Gallocatechin (GC)	Catechin derivatives
Rhs54	Positive	625.2	317.1	3.64	624.169	[M+H]+	-	Isorhamnetin 3-O-neohesperidoside	Flavonol
Rhs3	Positive	285.1	284.9	6.77	284.069	[M+H]+	C01470	Acacetin	Flavone
Rhs299	Negative	445.1	269	4.33	446.085	[M-H]-	C10025	Baicalein-7-O-glucuronide (Baicalin)	Flavone
Rhs101	Positive	373.1	373.1	7.32	372.121	[M+H]+	C10190	Tangeretin	Flavone
Rhs74	Positive	465.1	303.2	3.63	464.096	[M+H]+	C10108	Myricetin 3-O-rhamnoside (Myricitrin)	Flavonol
Rhs307	Negative	441.3	289.1	3.73	442.3	[M-H]-	-	Epicatechin gallate (ECG)	Catechin derivatives
Rhs80	Positive	287	241.1	4.83	286.048	[M+H]+	C10510	Orobol (5,7,3',4'-tetrahydroxyisoflavone)	Isoflavone
Rhs45	Positive	271.1	215.1	5.45	270.053	[M+H]+	C06563	Genistein (4',5,7-Trihydroxyisoflavone)	Isoflavone
Rhs41	Positive	289.1	153.1	4.85	288.063	[M+H]+	C05631	Eriodictyol	Flavanone
Rhs33	Positive	417.1	255.1	3.34	416.111	[M+H]+	C10216	Daidzein 7-O-glucoside (Daidzin)	Isoflavone
Rhs53	Positive	317.1	317.2	5.64	316.058	[M+H]+	C10084	Isorhamnetin	Flavonol
Rhs317	Negative	463.1	301.1	3.88	464.132	[M-H]-	-	Hesperetin 5-O-glucoside	Flavanone
Rhs17	Positive	303.1	167.1	6.07	302.079	[M+H]+	-	7-O-Methyleriodictyol	Flavanone
Rhs61	Positive	595.2	287	3.7	594.159	[M+H]+	-	Kaempferol 3-O-robinobioside (Biorobin)	Flavonol
Rhs432	Negative	433.1	433	3.6	434.121	[M-H]-	-	Isohemiphloin	Flavone
Rhs281	Negative	447.1	287.1	4.03	448.101	[M-H]-	C12249	Kaempferol 3-O-glucoside (Astragalin)	Flavonol
Rhs8	Positive	433.1	313.1	3.61	432.106	[M+H]+	C01714	Isovitexin	Flavone C-glycosides
Rhs98	Positive	287.1	287.1	6.73	286.084	[M+H]+	C09833	sakuranetin	Flavone
Rhs31	Positive	595	287.9	2.6	595	Protonated	C08620	Cyanidin 3-O-rutinoside (Keracyanin)	Anthocyanins
Rhs30	Positive	611	287.7	2.26	611	Protonated	C08639	Cyanidin 3,5-O-diglucoside (Cyanin)	Anthocyanins
Rhs83	Positive	595	271.8	2.45	595	Protonated	C08725	Pelargonin	Anthocyanins
Rhs277	Negative	301.1	242.1	5.63	302.079	[M-H]-	C01709	Hesperetin	Flavanone
Rhs70	Positive	449.1	287.1	3.7	448.101	[M+H]+	C03951	Luteolin 7-O-glucoside (Cynaroside)	Flavone
Rhs91	Positive	139.1	93	2.99	138.032	[M+H]+	C16700	Protocatechuic aldehyde	Catechin derivatives
Rhs90	Positive	155	137	2.42	154.027	[M+H]+	C00230	Protocatechuic acid	Catechin derivatives
Rhs57	Positive	579.2	433.1	3.67	578.164	[M+H]+	C16981	Kaempferol 3,7-dirhamnoside (Kaempferitrin)	Flavonol
Rhs37	Positive	321.1	153.1	3.36	320.053	[M+H]+	C02906	Dihydromyricetin	Flavonol
Rhs319	Negative	609.2	301.1	3.99	610.19	[M-H]-	C09755	Hesperetin 7-rutinoside (Hesperidin)	Flavanone
Rhs93	Positive	303	303	4.92	302.043	[M+H]+	C00389	Quercetin	Flavonol
Rhs78	Positive	273.1	153.1	5.3	272.069	[M+H]+	C06561	Naringenin chalcone	Flavanone
Rhs297	Negative	287.1	125.1	4.43	288.063	[M-H]-	C00974	Aromadedrin (Dihydrokaempferol)	Flavonol
Rhs320	Negative	675.2	513.2	4.83	676.237	[M-H]-	C17555	Icariin (kaempferol 3,7-O-diglucoside 8-prenyl derivative)	Flavonol
Rhs103	Positive	347.3	285.4	6.47	346.251	[M+H]+	-	Troxerutin (Trihydroxyethyl rutin)	Flavonol
Rhs86	Positive	257.1	153	6.85	256.074	[M+H]+	C09827	Pinocembrin (Dihydrochrysin)	Flavanone
Rhs325	Negative	593	285.2	4.85	594.195	[M-H]-	C09830	Isosakuranetin-7-neohesperidoside (Poncirin)	Flavanone
Rhs359	Negative	463	301	4.03	464.096	[M-H]-	-	Quercetin 4'-O-glucoside (Spiraeoside)	Flavonol
Rhs316	Negative	445	282.1	3.42	446.121	[M-H]-	C16195	Glycitin	Isoflavone
Rhs46	Positive	433	270.9	3.84	432.106	[M+H]+	C09126	Genistein 7-O-Glucoside (Genistin)	Isoflavone
Rhs1	Positive	465	302.8	3.68	464.096	[M+H]+	C05623	Quercetin 3-O-glucoside (Isotrifoliin)	Flavonol
Rhs52	Positive	257	137.1	5.91	256.074	[M+H]+	C08650	Isoliquiritigenin	Flavanone
Rhs366	Negative	577	413.1	3.49	578.164	[M-H]-	C12628	Vitexin 2''-O-beta-L-rhamnoside	Flavone C-glycosides
Rhs24	Positive	285	270.2	7	284.069	[M+H]+	C00814	Biochanin A	Isoflavone
Rhs315	Negative	283	268.1	4.89	284.069	[M-H]-	C14536	Glycitein	Isoflavone
Rhs36	Positive	611	303	2.26	611	Protonated	C16315	Delphinidin 3-O-rutinoside (Tulipanin)	Anthocyanins
Rhs289	Negative	269	241.1	4.32	270.053	[M-H]-	C14314	6-Hydroxydaidzein	Isoflavone
Rhs284	Negative	269	225	4.37	270.053	[M-H]-	C02495	2'-Hydroxydaidzein	Isoflavone
Rhs280	Negative	447	284	3.86	448.101	[M-H]-	C12626	Kaempferol 3-O-galactoside (Trifolin)	Flavonol
Rhs2	Positive	287	217.1	4.79	286.048	[M+H]+	C12134	2'-Hydroxygenistein	Isoflavone
Rhs18	Positive	275	139.1	3.29	274.084	[M+H]+	C09320	Afzelechin (3,5,7,4'-Tetrahydroxyflavan)	Flavanone
Rhs13	Positive	331	316	6.44	330.074	[M+H]+	C01265	3,7-Di-O-methylquercetin	Flavonol
Rhs282	Negative	283	268.1	6.95	284.069	[M-H]-	C10521	Prunetin	Isoflavone
Rhs328	Negative	431	285.1	4.29	432.106	[M-H]-	C16911	Kaempferol 3-O-rhamnoside (Kaempferin)	Flavonol
Rhs365	Negative	301	149.1	4.38	302.043	[M-H]-	C10192	Tricetin	Flavone
Rhs96	Positive	317	317	6.19	316.058	[M+H]+	C10176?	Rhamnetin (7-O-methxyl quercetin)	Flavonol
Rhs84	Positive	479	317	2.42	479	Protonated	C12139	Petunidin 3-O-glucoside	Anthocyanins
Rhs82	Positive	433.1	271	2.58	433.1	Protonated	-	Pelargonidin 3-O-beta-D-glucoside（Callistephin chloride)	Anthocyanins
Rhs313	Negative	287	135.1	3.66	288.063	[M-H]-	C01378	Fustin	Flavonol
Rhs99	Positive	447.1	285.1	5.1	446.121	[M+H]+	C05376	Sissotrin	Isoflavone
Rhs100	Positive	347	287.1	5.59	346.069	[M+H]+	C11620	Syringetin	Flavonol
Rhs334	Negative	331	316.1	4.96	332.053	[M-H]-	C12633	Laricitrin	Flavonol
Rhs25	Positive	273.1	137.1	5.3	272.069	[M+H]+	C08578	Butein	Flavanone
Rhs360	Negative	477.1	301.1	3.68	478.36	[M-H]-	-	Quercetin 7-O-β-D-Glucuronide	Flavonol
Rhs55	Positive	287.1	161.1	6.81	286.084	[M+H]+	C05334	Isosakuranetin (4'-Methylnaringenin)	Flavanone
Rhs332	Negative	739.2	593.3	3.28	740.216	[M-H]-	C10178	Kaempferol-3-O-robinoside-7-O-rhamnoside (Robinin)	Flavonol
Rhs5	Positive	273.1	153.1	5.45	272.069	[M+H]+	C09614	Butin	Flavone
Rhs341	Negative	479.1	317.3	3.43	480.09	[M-H]-	-	Myricetin 3-O-galactoside	Flavonol
Rhs339	Negative	301	151.1	4.97	302.043	[M-H]-	C10105	Morin	Flavonol
Rhs29	Positive	287	231.6	3.45	287.24	Protonated	C05905	Cyanidin	Anthocyanins
