# Supplementary material for: Metabolite analysis reveals flavonoids accumulation during flower development in Rhododendron pulchrum sweet (Ericaceae)
Source: PeerJ journal article supplement (doi:10.7717/peerj.17325), 2024-05-31
Supplement: Table_S2.xlsx [file Table_S2.xlsx]

## Sheet: all_pca_result2
Table S2 The all variables included in the PCA
	PC1	PC2	PC3	PC4	PC5	PC6	PC7	PC8	PC9
Standard deviation	9.89903	6.64878	5.39741	2.96868	2.49826	2.35235	2.11124	1.62039	3.24354e-15
Proportion of Variance	0.49242	0.22214	0.14639	0.04429	0.03136	0.02781	0.0224	0.01319	0
Cumulative Proportion	0.49242	0.71456	0.86095	0.90524	0.9366	0.96441	0.98681	1	1
