# Supplementary material for: Metabolite analysis reveals flavonoids accumulation during flower development in Rhododendron pulchrum sweet (Ericaceae)
Source: PeerJ journal article supplement (doi:10.7717/peerj.17325), 2024-05-31
Supplement: Table_S3.xlsx [file Table_S3.xlsx]

## Sheet: Sheet1
Table S3 List of 78 DAMs detected in R. pulchrum during flowering
Index	Compounds	Class	Stage-1_vs_Stage-2	Stage-1_vs_Stage-3-1	Stage-2_vs_Stage-3-1	Zihe-bud-stage-1	Zihe-bud-stage-2	Zihe-initial-flowering-stage-1	Zihe-initial-flowering-stage-2	Zihe-bloom-stage-1	Zihe-bloom-stage-2	cpd_ID	kegg_map
Rhs100	Syringetin	Flavonol	TRUE	FALSE	FALSE	13400	17500	6810	7360	9500	10900	C11620	ko00944
Rhs106	Apigenin 7-O-glucoside (Cosmosiin)	Flavone	FALSE	TRUE	TRUE	140000	147000	142000	124000	523000	387000	C04608	ko00944
Rhs113	6-C-hexosyl chrysoeriol O-hexoside	Flavone C-glycosides	FALSE	TRUE	TRUE	6950	8160	3970	4100	27900	30600	--	--
Rhs118	6-C-hexosyl-chrysoeriol O-feruloylhexoside	Flavone C-glycosides	FALSE	TRUE	TRUE	7930	8370	6590	6580	1570	1510	--	--
Rhs13	3,7-Di-O-methylquercetin	Flavonol	TRUE	TRUE	TRUE	9	9	4090	3570	45000	51500	C01265	ko00944
Rhs130	Acacetin O-glucuronic acid	Flavone	TRUE	TRUE	TRUE	2230	2950	10600	13700	93600	107000	--	--
Rhs131	Apigenin 6-C-hexosyl-8-C-hexosyl-O-hexoside	Flavone C-glycosides	FALSE	TRUE	TRUE	9	9	9	9	39400	45900	--	--
Rhs134	Apigenin C-glucoside	Flavone C-glycosides	FALSE	TRUE	TRUE	5760	5370	8400	10900	1570000	1690000	--	--
Rhs144	C-hexosyl-apigenin O-hexosyl-O-hexoside	Flavone C-glycosides	TRUE	FALSE	FALSE	5640	5300	10500	15000	5900	6770	--	--
Rhs157	C-hexosyl-luteolin O-hexoside	Flavone C-glycosides	FALSE	TRUE	TRUE	15200	14800	8180	9970	1640	1090	--	--
Rhs158	C-hexosyl-luteolin O-hexosyl-O-pentoside	Flavone C-glycosides	TRUE	FALSE	TRUE	1040	686	473	9	1260	1720	--	--
Rhs162	Chrysin 5-O-glucoside (Toringin)	Flavone	FALSE	TRUE	TRUE	3660	3440	5830	5510	54600	48500	--	--
Rhs164	Chrysin O-hexoside	Flavone	FALSE	TRUE	TRUE	6010	7980	10000	9630	62600	68300	--	--
Rhs166	Chrysoeriol 5-O-hexoside	Flavone	FALSE	TRUE	TRUE	96100	86700	53500	41500	990000	927000	--	--
Rhs167	Chrysoeriol 6-C-hexoside	Flavone C-glycosides	TRUE	FALSE	FALSE	3050	2030	6410	5070	5130	6470	--	--
Rhs17	7-O-Methyleriodictyol	Flavanone	FALSE	TRUE	TRUE	7180	3150	5080	3370	26400	25500	--	--
Rhs170	Chrysoeriol 7-O-rutinoside	Flavone	FALSE	TRUE	TRUE	15000	14600	12500	10700	84500	67000	--	--
Rhs174	Chrysoeriol O-glucuronic acid	Flavone	TRUE	TRUE	TRUE	2960	3610	1030	1220	13200	15800	--	--
Rhs175	Chrysoeriol O-glucuronic acid-O-hexoside	Flavone	FALSE	TRUE	TRUE	41300	38400	40900	37600	110000	118000	--	--
Rhs177	Chrysoeriol O-hexosyl-O-pentoside	Flavone	TRUE	TRUE	TRUE	5910	25700	97900	56100	396000	376000	--	--
Rhs2	2'-Hydroxygenistein	Isoflavone	FALSE	TRUE	TRUE	647000	617000	362000	394000	161000	156000	C12134	ko00943
Rhs203	Kaempferide	Flavonol	FALSE	TRUE	TRUE	661000	871000	733000	706000	3260000	3190000	C10098	ko00944
Rhs21	Apigenin 5-O-glucoside	Flavone	FALSE	TRUE	TRUE	1890	1230	2290	2510	98900	101000	--	--
Rhs216	Naringenin C-hexoside	Flavone C-glycosides	FALSE	TRUE	TRUE	21400	24900	15900	16800	69600	67500	--	--
Rhs217	Naringenin O-malonylhexoside	Flavanone	FALSE	TRUE	TRUE	167000	151000	123000	142000	53600	53900	--	--
Rhs227	Quercetin 5-O-malonylhexosyl-hexoside	Flavonol	FALSE	TRUE	TRUE	2490	5300	2240	3680	648	976	--	--
Rhs231	Quercetin-3,4'-O-di-beta-glucopyranoside	Flavonol	FALSE	TRUE	TRUE	1510	4770	4420	1340	62700	59100	--	--
Rhs232	Rosinidin O-hexoside	Anthocyanins	TRUE	FALSE	FALSE	6810000	6990000	3070000	3040000	5810000	6080000	--	--
Rhs235	Selgin O-malonylhexoside	Flavone	FALSE	TRUE	TRUE	13700	16200	11900	8120	72300	66000	--	--
Rhs237	Syringetin 3-O-hexoside	Flavonol	FALSE	TRUE	TRUE	201000	246000	303000	318000	79800	57400	--	--
Rhs24	Biochanin A	Isoflavone	TRUE	TRUE	TRUE	2330	2070	12600	14800	221000	206000	C00814	ko00943
Rhs252	Tricin 5-O-feruloylhexoside	Flavone	FALSE	FALSE	TRUE	20100	12000	11200	9670	24300	24700	--	--
Rhs277	Hesperetin	Flavanone	TRUE	TRUE	FALSE	21700	24600	7930	8430	7630	6750	C01709	ko00941
Rhs28	Chrysin	Flavone	TRUE	TRUE	TRUE	6950	8470	29500	30000	417000	401000	C10028	ko00941
Rhs282	Prunetin	Isoflavone	TRUE	FALSE	FALSE	78900	95000	41000	41900	70600	63400	C10521	ko00943
Rhs284	2'-Hydroxydaidzein	Isoflavone	FALSE	TRUE	TRUE	1660	2510	5260	2480	41800	45500	C02495	ko00943
Rhs29	Cyanidin	Anthocyanins	FALSE	FALSE	TRUE	137000	149000	209000	206000	53000	76400	C05905	ko00941,ko00942
Rhs294	Amentoflavone	Flavone	TRUE	TRUE	TRUE	225	214	431	602	11000	1480	--	--
Rhs298	Baicalein (5,6,7-Trihydroxyflavone)	Flavone	FALSE	TRUE	FALSE	2050	1740	2510	3730	5890	6110	--	--
Rhs31	Cyanidin 3-O-rutinoside (Keracyanin)	Anthocyanins	FALSE	TRUE	TRUE	2000000	2010000	1200000	1230000	371000	365000	C08620	ko00942
Rhs316	Glycitin	Isoflavone	TRUE	FALSE	FALSE	284000	222000	118000	100000	124000	135000	C16195	ko00943	Glycitein 7-O-glucoside
Rhs320	Icariin (kaempferol 3,7-O-diglucoside 8-prenyl derivative)	Flavonol	TRUE	TRUE	FALSE	727	1190	3380	1930	4360	4480	--	--
Rhs325	Isosakuranetin-7-neohesperidoside (Poncirin)	Flavanone	FALSE	FALSE	TRUE	206000	224000	115000	118000	510000	500000	--	--
Rhs33	Daidzein 7-O-glucoside (Daidzin)	Isoflavone	FALSE	TRUE	TRUE	7900	5160	6480	6840	52300	50000	C10216	ko00943
Rhs332	Kaempferol-3-O-robinoside-7-O-rhamnoside (Robinin)	Flavonol	FALSE	TRUE	TRUE	4770	9750	7080	9990	78000	79500	--	--
Rhs34	Delphinidin	Anthocyanins	FALSE	TRUE	TRUE	69500	48800	41600	40600	208000	168000	C05908	ko00941,ko00942
Rhs379	Chrysoeriol 6-C-pentosyl-O-rutinoside	Flavone C-glycosides	TRUE	TRUE	TRUE	9	9	1080	1660	19700	20600	--	--
Rhs390	Chrysoeriol O-hexosyl-O-hexosyl-O-Glucuronic acid	Flavone	FALSE	TRUE	TRUE	38300	38800	24500	24400	6900	7200	--	--
Rhs396	Cyanidin O-syringic acid	Anthocyanins	FALSE	TRUE	FALSE	11600000	11700000	21800000	22700000	37800000	37600000	--	--
Rhs397	Di-O-methylquercetin	Flavonol	TRUE	TRUE	FALSE	257000	239000	93500	91200	89500	82100	--	--
Rhs399	Eriodictyol C-hexoside	Flavone C-glycosides	FALSE	TRUE	TRUE	799000	819000	779000	756000	7960000	8300000	--	--
Rhs405	Isorhamnetin O-acetyl-hexoside	Flavonol	FALSE	TRUE	TRUE	9210	6060	4050	9610	100000	76700	--	--
Rhs41	Eriodictyol	Flavanone	FALSE	TRUE	TRUE	4340000	4350000	2270000	2320000	758000	771000	C05631	ko00941
Rhs412	Protocatechuic acid O-glucoside	Catechin derivatives	FALSE	TRUE	TRUE	42400	47300	75700	93900	714000	714000	--	--
Rhs418	Tricin 5-O-hexoside	Flavone	FALSE	TRUE	FALSE	172000	144000	243000	254000	554000	528000	--	--
Rhs428	Tricin O-saccharic acid	Flavone	FALSE	FALSE	TRUE	118000	132000	97000	93500	275000	269000	--	--
Rhs430	Velutin	Flavone	TRUE	TRUE	TRUE	98.7	685	1640	2310	31900	24800	--	--
Rhs432	Isohemiphloin	Flavone	FALSE	TRUE	TRUE	25300	14900	40000	35400	221000	220000	--	--
Rhs46	Genistein 7-O-Glucoside (Genistin)	Isoflavone	FALSE	TRUE	TRUE	197000	207000	184000	186000	791000	596000	C09126	ko00943
Rhs53	Isorhamnetin	Flavonol	TRUE	TRUE	TRUE	8970	13600	1330	1740	43600	51300	--	--
Rhs55	Isosakuranetin (4'-Methylnaringenin)	Flavanone	TRUE	TRUE	FALSE	2500000	2510000	876000	908000	511000	526000	--	--
Rhs56	Kaempferol	Flavonol	FALSE	TRUE	TRUE	35900	33800	29300	33100	130000	111000	C05903	ko00941,ko00944
Rhs6	Chrysoeriol	Flavone	FALSE	TRUE	TRUE	47300	45500	31500	31000	264000	244000	C04293	ko00944	3'-O-Methylluteolin
Rhs61	Kaempferol 3-O-robinobioside (Biorobin)	Flavonol	TRUE	FALSE	FALSE	13200	20300	41600	47100	40100	35800	--	--
Rhs62	Kaempferol 3-O-rutinoside (Nicotiflorin)	Flavonol	TRUE	FALSE	FALSE	29100	33200	66900	69400	48100	51200	--	--
Rhs65	Kumatakenin	Flavonol	TRUE	TRUE	TRUE	993	2000	3820	2460	54600	44400	--	--
Rhs73	Myricetin	Flavonol	FALSE	TRUE	TRUE	4800000	4990000	3890000	3880000	273000	308000	C10107	ko00941,ko00944
Rhs77	Naringenin 7-O-neohesperidoside (Naringin)	Flavanone	FALSE	TRUE	TRUE	1950	6120	3200	1570	12700	12900	C09789	ko00941
Rhs78	Naringenin chalcone	Flavanone	FALSE	FALSE	TRUE	630000	641000	597000	639000	1630000	1760000	C06561	ko00941
Rhs79	Nobiletin	Flavone	TRUE	FALSE	FALSE	48300	2030	3670	3570	3660	4530	--	--
Rhs8	Isovitexin	Flavone C-glycosides	FALSE	TRUE	TRUE	7950	7780	11200	12300	2110000	2180000	C01714	ko00944
Rhs82	Pelargonidin 3-O-beta-D-glucoside（Callistephin chloride)	Anthocyanins	FALSE	TRUE	TRUE	94900	97800	187000	190000	1320000	1410000	--	--
Rhs83	Pelargonin	Anthocyanins	FALSE	TRUE	TRUE	242000	275000	273000	271000	1740000	1790000	C08725	ko00942
Rhs86	Pinocembrin (Dihydrochrysin)	Flavanone	FALSE	TRUE	TRUE	52600	56000	42800	40000	205000	211000	C09827	ko00941
Rhs90	Protocatechuic acid	Catechin derivatives	FALSE	TRUE	FALSE	35800	37900	19100	18400	13100	12600	--	--
Rhs96	Rhamnetin (7-O-methxyl quercetin)	Flavonol	FALSE	TRUE	FALSE	97600	97700	52200	50000	34100	31500	--	--
Rhs98	sakuranetin	Flavone	FALSE	TRUE	TRUE	11300	3680	10900	7500	112000	106000	--	--
Rhs99	Sissotrin	Isoflavone	FALSE	TRUE	TRUE	1580	585	679	763	3930	2850	C05376	ko00943
